# Supplementary material for: Ultra-short term HRV features as surrogates of short term HRV: a case study on mental stress detection in real life
Source: Springer Nature journal article supplement (doi:10.1186/s12911-019-0742-y), 2019-01-17
Supplement: MOESM1 [file 16403200]

SUPPLEMENTARY MATERIALS

HRV Features analysed in the current study are reported in Table S1.

TABLE S1  
HRV FEATURES

| <b>HRV Measures</b>             | <b>Units</b>       | <b>Description</b>                                                                                       |
|---------------------------------|--------------------|----------------------------------------------------------------------------------------------------------|
| <b><u>Time Domain</u></b>       |                    |                                                                                                          |
| <b>MeanNN</b>                   | [ms]               | The mean of NN intervals                                                                                 |
| <b>StdNN</b>                    | [ms]               | Standard deviation of NN intervals                                                                       |
| <b>MeanHR</b>                   | [1/min]            | The mean heart rate                                                                                      |
| <b>StdHR</b>                    | [1/min]            | Standard deviation of instantaneous heart rate values                                                    |
| <b>RMSSD</b>                    | [ms]               | Square root of the mean squared differences between successive NN intervals                              |
| <b>NN50</b>                     | -                  | Number of successive NN interval pairs that differ more than 50 ms                                       |
| <b>pNN50</b>                    | [%]                | NN50 divided by the total number of NN intervals                                                         |
| <b><u>Frequency Domain</u></b>  |                    |                                                                                                          |
| <b>LF</b>                       | [ms <sup>2</sup> ] | Low Frequency power (0.04-0.15Hz)                                                                        |
| <b>HF</b>                       | [ms <sup>2</sup> ] | High Frequency power                                                                                     |
| <b>LF/HF</b>                    | -                  | Ratio between LF and HF band powers                                                                      |
| <b>TotPow</b>                   | [ms <sup>2</sup> ] | Total power                                                                                              |
| <b><u>Non Linear Domain</u></b> |                    |                                                                                                          |
| <b>SD1, SD2</b>                 | [ms]               | The standard deviation of the Poincare' plot perpendicular to (SD1) and along (SD2) the line-of-identity |
| <b>ApEn</b>                     | -                  | Approximate entropy                                                                                      |
| <b>SampEn</b>                   | -                  | Sample entropy                                                                                           |
| <b>D2</b>                       | -                  | Correlation dimension                                                                                    |
| <b>dfa1, dfa2</b>               | -                  | Detrended fluctuation analysis: Short term and Long term fluctuation slope                               |
| <b>RPImean</b>                  | [beats]            | Recurrence plot analysis: Mean line length                                                               |
| <b>RPImax</b>                   | [beats]            | Recurrence plot analysis: Maximum line length                                                            |
| <b>REC</b>                      | [%]                | Recurrence rate                                                                                          |
| <b>RPadet</b>                   | [%]                | Recurrence plot analysis: Determinism                                                                    |
| <b>ShanEn</b>                   | -                  | Shannon entropy                                                                                          |

HRV features median (MD), standard deviation (SD), 25th and 75th percentiles extracted from 5 min, 3 min, 2 min, 1 min and 30 sec NN data series in S2, S3, S4, S5 and S6 respectively

TABLE S2  
HRV FEATURES IN REST AND STRESS FROM 5 MIN NN DATA SERIES

| HRV features | Short term: 5 min |          |          |        | MD       | SD      | 25      | 75       | p-value | Trend |
|--------------|-------------------|----------|----------|--------|----------|---------|---------|----------|---------|-------|
|              | Rest              |          | Stress   |        |          |         |         |          |         |       |
|              | MD                | SD       | 25       | 75     |          |         |         |          |         |       |
| MeanNN       | 726.988           | 83.695   | 647.623  | 776.49 | 483.594  | 66.464  | 446.027 | 512.257  | 0.000   | ↓↓    |
| StdNN        | 59.642            | 18.383   | 44.455   | 70.007 | 36.619   | 16.266  | 26.438  | 46.990   | 0.000   | ↓↓    |
| MeanHR       | 82.976            | 9.704    | 78.038   | 93.138 | 125.242  | 16.711  | 117.422 | 135.807  | 0.000   | ↑↑    |
| StdHR        | 6.378             | 1.812    | 5.579    | 7.234  | 9.084    | 3.350   | 6.997   | 11.509   | 0.000   | ↑↑    |
| RMSSD        | 33.806            | 14.719   | 22.848   | 42.490 | 34.120   | 16.643  | 18.069  | 46.997   | 0.996   | ↑     |
| NN50         | 49.500            | 41.888   | 17.000   | 80.000 | 55.000   | 68.568  | 12.000  | 102.000  | 0.499   | ↑     |
| pNN50        | 12.332            | 11.336   | 3.899    | 19.722 | 9.218    | 10.004  | 1.984   | 17.354   | 0.341   | ↓     |
| LF           | 1661.164          | 1252.052 | 995.772  | 2497.8 | 454.370  | 874.453 | 186.016 | 1070.183 | 0.000   | ↓↓    |
| HF           | 381.739           | 488.299  | 212.089  | 591.26 | 141.648  | 233.871 | 67.719  | 344.740  | 0.000   | ↓↓    |
| LF/HF        | 4.646             | 2.512    | 2.811    | 6.424  | 3.267    | 2.181   | 1.943   | 4.662    | 0.011   | ↓↓    |
| TotPow       | 3313.660          | 2160.757 | 1953.027 | 4694.2 | 1045.958 | 1709.43 | 427.809 | 2214.643 | 0.000   | ↓↓    |
| SD1          | 23.936            | 10.423   | 16.172   | 30.081 | 24.146   | 11.777  | 12.788  | 33.267   | 0.996   | ↑     |
| SD2          | 79.555            | 24.420   | 61.047   | 94.592 | 46.969   | 22.878  | 31.713  | 57.903   | 0.000   | ↓↓    |
| ApEn         | 1.103             | 0.125    | 1.020    | 1.193  | 0.933    | 0.240   | 0.842   | 1.178    | 0.012   | ↓↓    |
| SampEn       | 1.325             | 0.272    | 1.111    | 1.546  | 0.876    | 0.392   | 0.760   | 1.228    | 0.000   | ↓↓    |
| D2           | 3.179             | 1.090    | 2.245    | 3.544  | 1.496    | 1.283   | 0.469   | 2.575    | 0.000   | ↓↓    |
| dfa1         | 1.439             | 0.161    | 1.283    | 1.511  | 1.043    | 0.446   | 0.690   | 1.447    | 0.000   | ↓↓    |
| dfa2         | 0.716             | 0.183    | 0.644    | 0.954  | 0.767    | 0.136   | 0.679   | 0.852    | 0.862   | ↑     |
| RPlmean      | 10.439            | 2.479    | 9.519    | 12.688 | 13.326   | 6.771   | 11.105  | 16.920   | 0.002   | ↑↑    |
| RPlmax       | 282.000           | 111.223  | 178.000  | 384.00 | 179.000  | 136.599 | 86.000  | 282.000  | 0.004   | ↓↓    |
| REC          | 32.570            | 6.276    | 29.553   | 37.592 | 43.252   | 12.050  | 36.107  | 49.023   | 0.000   | ↑↑    |
| RPadet       | 98.776            | 0.858    | 98.314   | 99.204 | 99.254   | 1.277   | 98.138  | 99.633   | 0.034   | ↑↑    |
| ShanEn       | 3.139             | 0.233    | 3.044    | 3.363  | 3.418    | 0.398   | 3.210   | 3.642    | 0.001   | ↑↑    |

MD.: Median; SD: Standard Deviation; Trend; ↓↓ (↑↑): significantly lower (higher) under stress (p<.05); ↓(↑): lower (higher) under stress (p>.05)

TABLE S3  
HRV FEATURES IN REST AND STRESS FROM 3 MIN NN DATA SERIES

| Ultra-short term: 3 min |          |          |          |          |         |          |         |         |         |       |
|-------------------------|----------|----------|----------|----------|---------|----------|---------|---------|---------|-------|
| HRV features            | Rest     |          |          |          | Stress  |          |         |         | p-value | Trend |
|                         | MD       | SD       | 25       | 75       | MD      | SD       | 25      | 75      |         |       |
| MeanNN                  | 725.245  | 82.97562 | 651.83   | 773.57   | 482.705 | 67.07718 | 443.36  | 522.57  | 0.000   | ↓↓    |
| StdNN                   | 57.709   | 17.957   | 41.214   | 69.298   | 35.211  | 17.773   | 26.797  | 46.104  | 0.000   | ↓↓    |
| MeanHR                  | 83.367   | 9.644    | 78.045   | 92.336   | 124.860 | 17.098   | 117.070 | 136.07  | 0.000   | ↑↑    |
| StdHR                   | 6.251    | 1.866    | 5.397    | 7.449    | 8.943   | 3.488    | 6.452   | 12.57   | 0.000   | ↑↑    |
| RMSSD                   | 33.283   | 14.465   | 24.099   | 42.016   | 34.344  | 16.637   | 18.856  | 46.81   | 0.764   | ↑     |
| NN50                    | 28.500   | 24.984   | 10.000   | 44.000   | 35.500  | 40.741   | 7.000   | 66      | 0.359   | ↑     |
| pNN50                   | 11.941   | 11.087   | 3.831    | 19.731   | 9.968   | 9.954    | 1.728   | 17.5    | 0.418   | ↓     |
| LF                      | 1397.950 | 1475.536 | 569.630  | 2224.400 | 415.345 | 852.459  | 106.490 | 889.28  | 0.000   | ↓↓    |
| HF                      | 297.630  | 442.760  | 173.440  | 516.530  | 101.281 | 281.341  | 56.541  | 291.13  | 0.000   | ↓↓    |
| LF/HF                   | 4.597    | 2.746    | 2.912    | 5.674    | 3.607   | 3.353    | 1.553   | 5.1267  | 0.048   | ↓↓    |
| TotPow                  | 2529.000 | 2154.584 | 1845.000 | 4745.000 | 735.500 | 2056.264 | 286.000 | 1642    | 0.000   | ↓↓    |
| SD1                     | 23.583   | 10.253   | 17.081   | 29.774   | 24.317  | 11.779   | 13.349  | 33.147  | 0.785   | ↑     |
| SD2                     | 77.528   | 23.960   | 54.410   | 90.998   | 40.775  | 25.432   | 30.339  | 58.666  | 0.000   | ↓↓    |
| ApEn                    | 0.987    | 0.093    | 0.923    | 1.039    | 0.870   | 0.192    | 0.780   | 1.0491  | 0.041   | ↓↓    |
| SampEn                  | 1.350    | 0.258    | 1.173    | 1.531    | 0.928   | 0.420    | 0.701   | 1.2753  | 0.000   | ↓↓    |
| D2                      | 3.045    | 1.069    | 2.044    | 3.385    | 1.398   | 1.208    | 0.331   | 2.4175  | 0.000   | ↓↓    |
| dfa1                    | 1.440    | 0.190    | 1.302    | 1.543    | 1.075   | 0.468    | 0.653   | 1.3822  | 0.000   | ↓↓    |
| dfa2                    | 0.728    | 0.188    | 0.614    | 0.875    | 0.761   | 0.170    | 0.624   | 0.86762 | 0.911   | ↑     |
| RPlmean                 | 10.171   | 2.876    | 8.898    | 13.569   | 13.224  | 7.291    | 10.427  | 16.665  | 0.023   | ↑↑    |
| RPlmax                  | 179.000  | 65.203   | 110.000  | 230.000  | 141.000 | 96.181   | 74.000  | 201     | 0.117   | ↓↓    |
| REC                     | 33.058   | 7.586    | 27.676   | 38.662   | 42.708  | 14.129   | 32.762  | 50.409  | 0.003   | ↑↑    |
| RPadet                  | 98.774   | 0.935    | 98.097   | 99.249   | 99.195  | 1.541    | 97.826  | 99.632  | 0.074   | ↑     |
| ShanEn                  | 3.089    | 0.264    | 2.943    | 3.332    | 3.361   | 0.428    | 3.131   | 3.5907  | 0.009   | ↑↑    |

MD.: Median; SD: Standard Deviation; Trend; ↓↓ (↑↑): significantly lower (higher) under stress (p<.05); ↓(↑): lower (higher) under stress (p>.05)

TABLE S4  
HRV FEATURES IN REST AND STRESS FROM 2 MIN NN DATA SERIES

| Ultra-short term: 2 min |          |          |          |          |         |          |         |          |         |       |
|-------------------------|----------|----------|----------|----------|---------|----------|---------|----------|---------|-------|
| HRV features            | Rest     |          |          |          | Stress  |          |         |          | p-value | Trend |
|                         | MD       | SD       | 25       | 75       | MD      | SD       | 25      | 75       |         |       |
| MeanNN                  | 720.278  | 97.448   | 651.239  | 767.654  | 477.222 | 69.265   | 440.625 | 528.335  | 0.000   | ↓↓    |
| StdNN                   | 49.102   | 19.016   | 39.252   | 69.378   | 34.953  | 18.357   | 26.144  | 43.930   | 0.000   | ↓↓    |
| MeanHR                  | 83.786   | 14.068   | 78.615   | 92.636   | 126.107 | 17.810   | 115.474 | 137.403  | 0.000   | ↑↑    |
| StdHR                   | 6.147    | 2.044    | 5.174    | 7.253    | 8.481   | 3.560    | 6.715   | 12.470   | 0.000   | ↑↑    |
| RMSSD                   | 32.819   | 14.947   | 20.201   | 39.421   | 34.791  | 17.349   | 17.536  | 47.076   | 0.986   | ↑     |
| NN50                    | 16.000   | 16.992   | 7.000    | 26.000   | 23.000  | 28.112   | 3.000   | 42.000   | 0.496   | ↑     |
| pNN50                   | 9.650    | 11.153   | 3.784    | 16.129   | 10.333  | 10.147   | 1.038   | 16.342   | 0.452   | ↑     |
| LF                      | 1359.861 | 1362.088 | 736.544  | 2559.886 | 416.867 | 997.892  | 145.482 | 836.823  | 0.000   | ↓↓    |
| HF                      | 312.068  | 443.887  | 165.133  | 564.119  | 134.815 | 280.732  | 61.680  | 264.583  | 0.000   | ↓↓    |
| LF/HF                   | 4.498    | 2.977    | 2.997    | 5.899    | 3.321   | 3.195    | 1.517   | 5.093    | 0.031   | ↓↓    |
| TotPow                  | 2460.120 | 2046.273 | 1637.191 | 4269.091 | 814.113 | 2180.514 | 305.468 | 1735.691 | 0.000   | ↓↓    |
| SD1                     | 23.275   | 10.610   | 14.323   | 27.963   | 24.651  | 12.291   | 12.430  | 33.350   | 1.000   | ↑     |
| SD2                     | 66.157   | 25.363   | 53.775   | 93.058   | 38.650  | 26.374   | 29.384  | 55.751   | 0.000   | ↓↓    |
| ApEn                    | 0.856    | 0.086    | 0.796    | 0.893    | 0.809   | 0.153    | 0.692   | 0.929    | -       | -     |
| SampEn                  | 1.311    | 0.337    | 1.128    | 1.502    | 0.952   | 0.405    | 0.663   | 1.210    | 0.000   | ↓↓    |
| D2                      | 2.603    | 1.018    | 1.798    | 3.148    | 1.187   | 1.241    | 0.320   | 2.765    | 0.002   | ↓↓    |
| dfa1                    | 1.419    | 0.219    | 1.346    | 1.590    | 0.988   | 0.482    | 0.656   | 1.542    | 0.000   | ↓↓    |
| dfa2                    | 0.651    | 0.220    | 0.572    | 0.864    | 0.690   | 0.213    | 0.592   | 0.847    | 0.549   | ↑     |
| RPlmean                 | 9.821    | 3.798    | 8.565    | 12.312   | 12.828  | 8.599    | 9.998   | 15.587   | 0.021   | ↑↑    |
| RPlmax                  | 135.000  | 48.793   | 82.000   | 156.000  | 109.000 | 72.475   | 62.000  | 181.000  | 0.734   | ↓     |
| REC                     | 31.491   | 8.596    | 26.695   | 38.403   | 40.450  | 15.503   | 31.421  | 49.258   | 0.011   | ↑↑    |
| RPadet                  | 98.780   | 1.003    | 98.046   | 99.207   | 99.154  | 1.797    | 98.224  | 99.685   | 0.089   | ↑     |
| ShanEn                  | 3.008    | 0.307    | 2.854    | 3.225    | 3.232   | 0.429    | 3.030   | 3.506    | 0.021   | ↑↑    |

MD.: Median; SD: Standard Deviation; Trend; ↓↓ (↑↑): significantly lower (higher) under stress (p<.05); ↓(↑): lower (higher) under stress (p>.05); -: not computable

TABLE S5  
HRV FEATURES IN REST AND STRESS FROM 1 MIN NN DATA SERIES

| Ultra-short term: 1 min |          |          |          |          |         |          |         |          |         |       |
|-------------------------|----------|----------|----------|----------|---------|----------|---------|----------|---------|-------|
| HRV features            | Rest     |          |          |          | Stress  |          |         |          |         |       |
|                         | MD       | SD       | 25       | 75       | MD      | SD       | 25      | 75       | p-value | Trend |
| MeanNN                  | 725.169  | 87.204   | 658.022  | 777.922  | 492.167 | 78.866   | 450.060 | 539.117  | 0.000   | ↓↓    |
| StdNN                   | 48.554   | 18.505   | 40.710   | 63.065   | 33.978  | 17.420   | 25.249  | 43.979   | 0.000   | ↓↓    |
| MeanHR                  | 83.153   | 10.087   | 77.476   | 91.438   | 122.549 | 18.442   | 111.545 | 133.686  | 0.000   | ↑↑    |
| StdHR                   | 5.799    | 2.433    | 4.624    | 6.731    | 8.003   | 3.500    | 6.124   | 10.981   | 0.000   | ↑↑    |
| RMSSD                   | 30.806   | 15.435   | 25.018   | 38.449   | 31.269  | 18.370   | 13.395  | 45.394   | 0.823   | ↑     |
| NN50                    | 7.500    | 8.396    | 4.000    | 14.000   | 11.500  | 14.956   | 1.000   | 23.000   | 0.382   | ↑     |
| pNN50                   | 10.201   | 10.539   | 4.444    | 17.722   | 10.156  | 11.444   | 0.848   | 16.556   | 0.505   | ↓     |
| LF                      | 1605.850 | 1567.523 | 563.291  | 2711.665 | 284.957 | 828.234  | 112.012 | 725.210  | -       | -     |
| HF                      | 367.511  | 381.504  | 190.971  | 497.143  | 103.378 | 280.790  | 42.947  | 230.933  | 0.000   | ↓↓    |
| LF/HF                   | 4.398    | 3.216    | 2.906    | 5.730    | 3.443   | 4.408    | 1.427   | 6.237    | -       | -     |
| TotPow                  | 2557.366 | 2143.559 | 1464.690 | 4488.421 | 550.976 | 1614.007 | 212.826 | 1335.339 | -       | -     |
| SD1                     | 21.919   | 10.988   | 17.790   | 27.369   | 22.197  | 13.042   | 9.514   | 32.244   | 0.775   | ↑     |
| SD2                     | 66.060   | 24.540   | 55.730   | 85.111   | 36.032  | 24.563   | 27.547  | 53.614   | 0.000   | ↓↓    |
| ApEn                    | 0.602    | 0.085    | 0.545    | 0.655    | 0.629   | 0.098    | 0.584   | 0.696    | -       | -     |
| SampEn                  | 1.305    | 0.336    | 1.166    | 1.639    | 0.984   | 0.455    | 0.727   | 1.474    | 0.001   | ↓↓    |
| D2                      | 2.509    | 0.875    | 1.737    | 2.868    | 1.317   | 1.196    | 0.417   | 2.632    | 0.002   | ↓↓    |
| dfa1                    | 1.473    | 0.221    | 1.205    | 1.577    | 1.200   | 0.505    | 0.785   | 1.545    | 0.009   | ↓↓    |
| dfa2                    | 0.684    | 0.337    | 0.552    | 0.957    | 0.684   | 0.276    | 0.553   | 0.913    | 0.540   | ↓     |
| RPImean                 | 8.410    | 2.493    | 7.388    | 9.519    | 10.558  | 4.509    | 7.426   | 13.639   | 0.075   | ↑     |
| RPImax                  | 67.000   | 16.783   | 51.000   | 77.000   | 71.000  | 32.599   | 36.000  | 97.000   | 0.681   | ↑     |
| REC                     | 29.679   | 7.495    | 24.992   | 36.131   | 34.787  | 13.899   | 25.887  | 44.335   | 0.107   | ↑     |
| RPadet                  | 98.278   | 1.311    | 97.248   | 98.799   | 98.076  | 2.246    | 95.955  | 99.301   | 0.957   | ↓     |
| ShanEn                  | 2.659    | 0.293    | 2.471    | 2.864    | 2.933   | 0.372    | 2.623   | 3.151    | 0.005   | ↑↑    |

MD.: Median; SD: Standard Deviation; Trend; ↓↓ (↑↑): significantly lower (higher) under stress (p<.05); ↓(↑): lower (higher) under stress (p>.05); -: not computable

TABLE S6  
HRV FEATURES IN REST AND STRESS FROM 30 SEC NN DATA SERIES

| Ultra-short term: 30 sec |          |          |          |          |         |          |         |          |         |       |
|--------------------------|----------|----------|----------|----------|---------|----------|---------|----------|---------|-------|
| HRV features             | Rest     |          |          |          | Stress  |          |         |          |         |       |
|                          | MD       | SD       | 25       | 75       | MD      | SD       | 25      | 75       | p-value | Trend |
| MeanNN                   | 720.853  | 89.963   | 650.870  | 772.564  | 480.738 | 72.726   | 444.000 | 529.298  | 0.000   | ↓↓    |
| StdNN                    | 48.619   | 18.875   | 33.701   | 66.484   | 31.894  | 18.916   | 19.215  | 41.428   | 0.000   | ↓↓    |
| MeanHR                   | 83.864   | 10.562   | 77.769   | 92.424   | 124.951 | 18.788   | 113.421 | 135.618  | 0.000   | ↑↑    |
| StdHR                    | 5.583    | 2.782    | 4.300    | 6.792    | 6.850   | 4.633    | 5.209   | 11.562   | 0.021   | ↑↑    |
| RMSSD                    | 30.829   | 17.345   | 21.260   | 42.370   | 28.998  | 21.791   | 10.732  | 47.465   | 0.247   | ↓     |
| NN50                     | 3.500    | 5.190    | 1.000    | 8.000    | 3.500   | 8.143    | 0.000   | 14.000   | 1.000   | ↑     |
| pNN50                    | 8.957    | 12.375   | 2.564    | 22.500   | 5.489   | 11.979   | 0.000   | 19.737   | 0.238   | ↓     |
| LF                       | 1207.038 | 1820.654 | 525.548  | 2956.652 | 180.888 | 1156.513 | 83.894  | 512.759  | -       | -     |
| HF                       | 242.283  | 928.954  | 142.342  | 453.410  | 69.902  | 214.315  | 31.608  | 157.711  | -       | -     |
| LF/HF                    | 5.292    | 5.237    | 1.760    | 8.531    | 3.699   | 7.685    | 1.320   | 7.962    | -       | -     |
| TotPow                   | 2051.232 | 7451.549 | 1058.810 | 3868.496 | 366.116 | 2403.753 | 162.112 | 1198.807 | -       | -     |
| SD1                      | 22.090   | 12.422   | 15.277   | 30.397   | 20.695  | 15.527   | 7.671   | 33.938   | 0.239   | ↓     |
| SD2                      | 64.777   | 25.347   | 43.553   | 89.512   | 34.382  | 25.793   | 22.181  | 47.197   | 0.000   | ↓↓    |

MD.: Median; SD: Standard Deviation; Trend; ↓↓ (↑↑): significantly lower (higher) under stress (p<.05); ↓(↑): lower (higher) under stress (p>.05); -: not computable
