# Supplementary material for: Ultra-short term HRV features as surrogates of short term HRV: a case study on mental stress detection in real life
Source: Springer Nature journal article supplement (doi:10.1186/s12911-019-0742-y), 2019-01-17
Supplement: MOESM3 [file 16403200]

## MeanNN during Stress

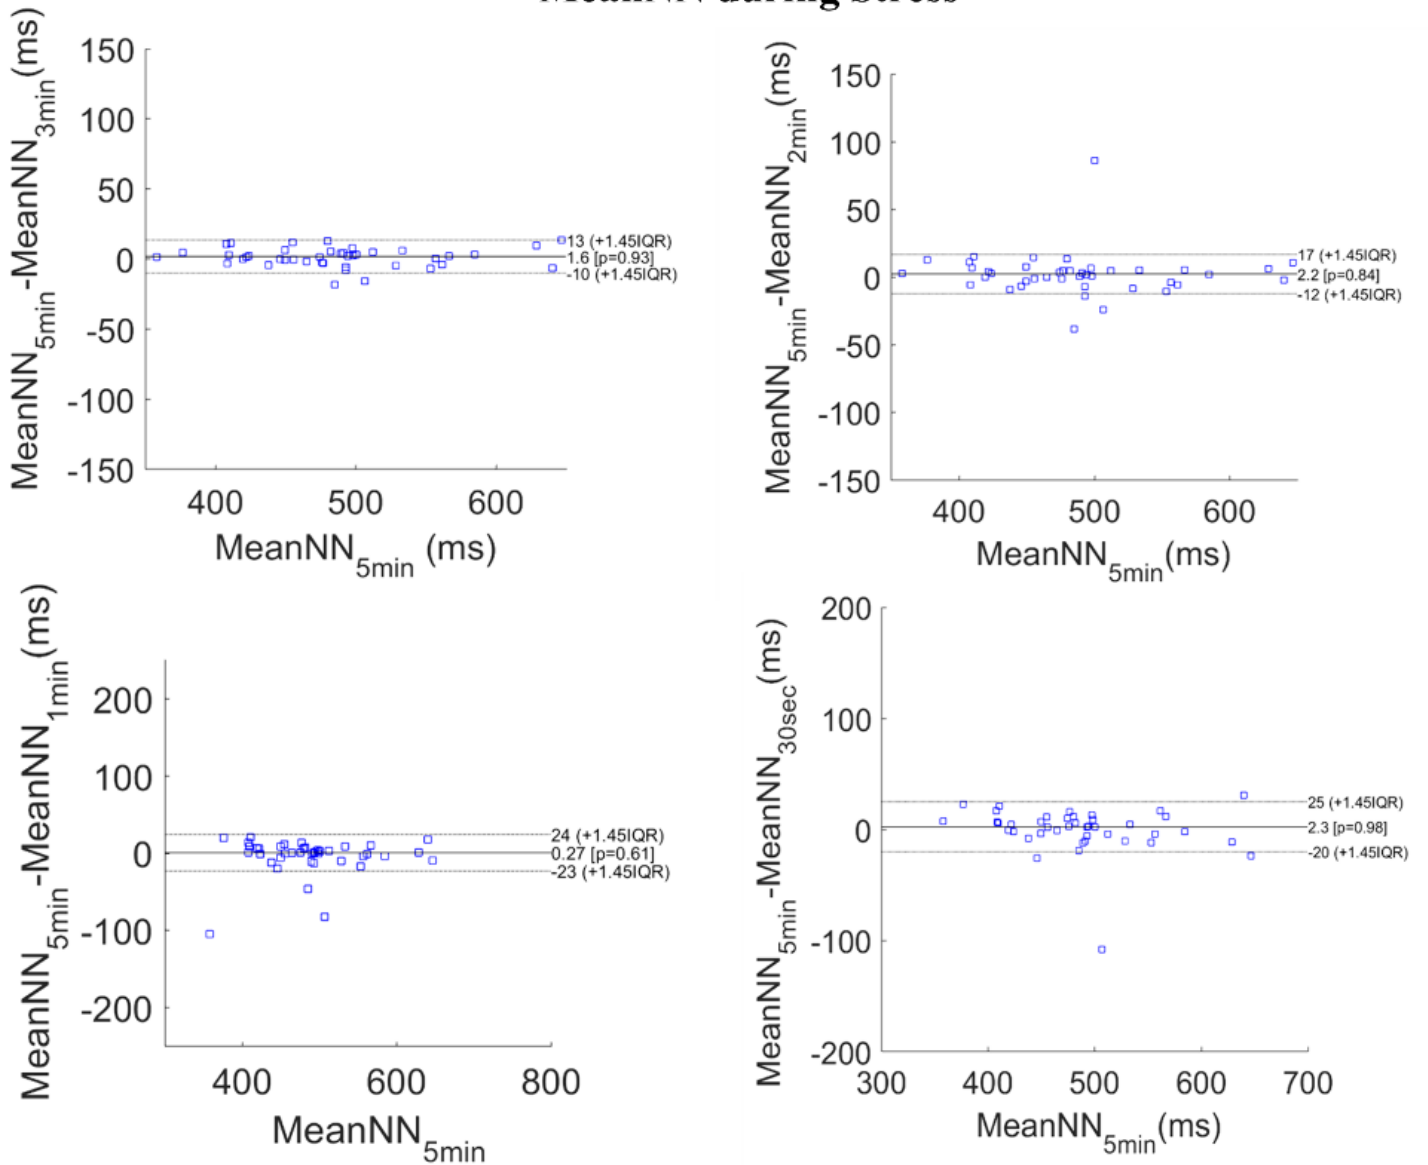

Fig. S2 Bland-Altman Plot of MeanNN during Stress. IQR: Interquartile range.
